# Supplementary material for: The Framework for 0-D Atmospheric Modeling (F0AM) v3.1
Source: Copernicus journal article supplement (doi:10.5194/gmd-9-3309-2016), 2016-09-20
Supplement: Supplementary file 1 [file gmd-9-3309-2016-supplement.zip]

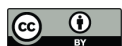

## *Supplement of*

# **The Framework for 0-D Atmospheric Modeling (F0AM) v3.1**

**Glenn M. Wolfe et al.**

*Correspondence to:* Glenn M. Wolfe ([glenn.m.wolfe@nasa.gov](mailto:glenn.m.wolfe@nasa.gov))

- gmd-9-3309-2016-supplement-title-page.pdf
- F0AMv3.1
  - Chem
    - \* Aerosol
    - \* CB05
    - \* CB6r2
    - \* FAC2F0AM.m
    - \* GEOSChem
    - \* MCMv32
    - \* MCMv331
    - \* Photolysis
    - \* RACM2
  - Core
    - \* AddSpecies.m
    - \* Check4NanNeg.m
    - \* CheckStructure.m
    - \* F0AM\_ModelCore.m
    - \* GenFileName.m
    - \* GenFilePath.m
    - \* InitializeChemistry.m
    - \* Jac\_eval.m
    - \* LocateString.m
    - \* ParsePairs.m
    - \* ReplaceRxn.m
    - \* cellstr2str.m
    - \* dydt\_eval.m
    - \* ffVII\_victory.wav
    - \* meter.m

- \* repval.m
- \* superunion.m
- \* victory.m
- Docs
  - \* CopyrightLicense.txt
  - \* F0AM\_ChangeLog.txt
  - \* gpl-3.0.txt
- F0AM\_GettingStarted.pdf
- F0AM\_GettingStarted.pptx
- F0AMv3\_readme.docx
- F0AMv3\_readme.pdf
- Plots
  - \* ParseRates.m
  - \* PlotConc.m
  - \* PlotConcGroup.m
  - \* PlotRates.m
  - \* PlotRatesAvg.m
  - \* PlotReactivity.m
  - \* PlotYield.m
  - \* fillcolors.mat
  - \* plot11.m
  - \* purtyPlot.m
- Runs
- Setups
  - \* Examples
- Tools
  - \* ConvertHumidity.m
  - \* DataCleaner.m
  - \* ExtractRates.m
  - \* ExtractSpecies.m
  - \* IndexEQ.m
  - \* NumberDensity.m
  - \* ReplaceNaN.m
  - \* Rparts.m
  - \* Run2Init.m
  - \* SMILES
  - \* ScaleData.m
  - \* SplitRun.m
  - \* breakin.m
  - \* breakout.m
  - \* lifetime.m
  - \* struct2var.m
  - \* sun\_position.m

The copyright of individual parts of the supplement might differ from the CC-BY 3.0 licence.
